# Supplementary material
Source: ML conference proceedings conference paper supplement (https://openreview.net/forum?id=uO3gGxzu8k)

Reward

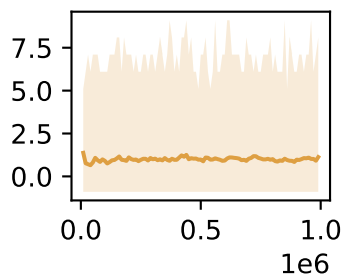

Length

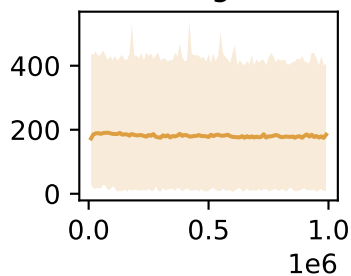

Collect Coal

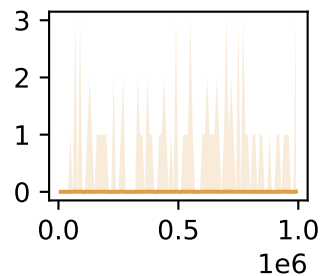

Collect Diamond

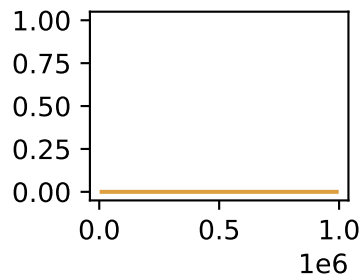

Collect Drink

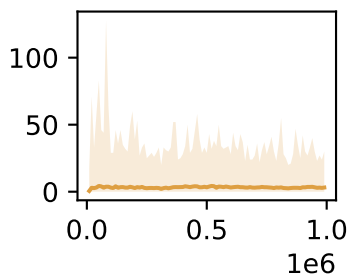

Collect Iron

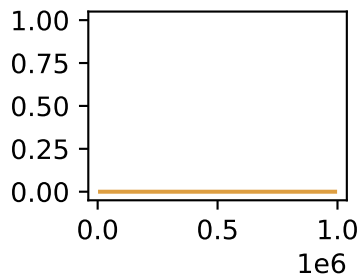

Collect Sapling

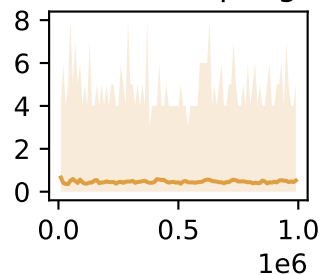

Collect Stone

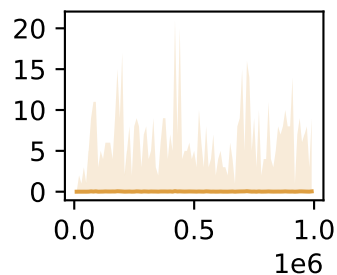

Collect Wood

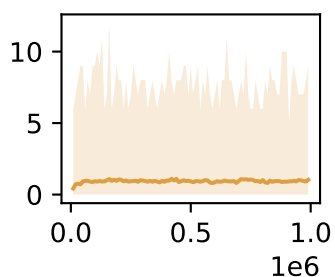

Defeat Skeleton

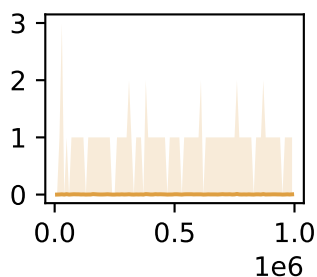

Defeat Zombie

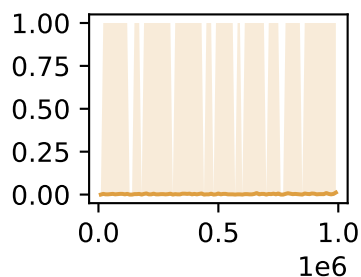

Eat Cow

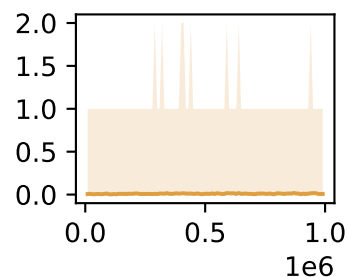

Eat Plant

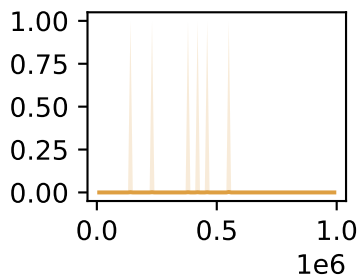

Make Iron Pickaxe

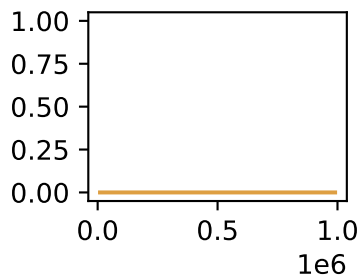

Make Iron Sword

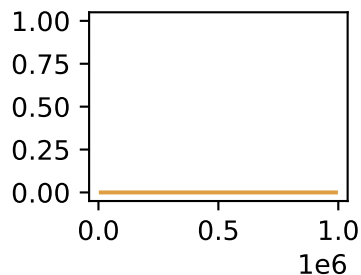

Make Stone Pickaxe

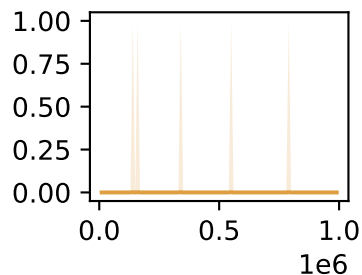

Make Stone Sword

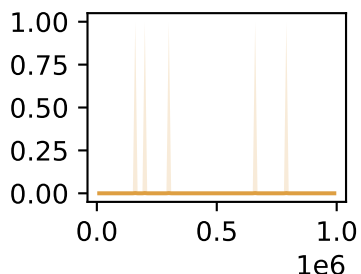

Make Wood Pickaxe

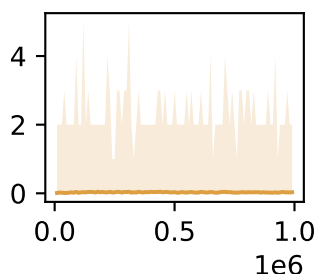

Make Wood Sword

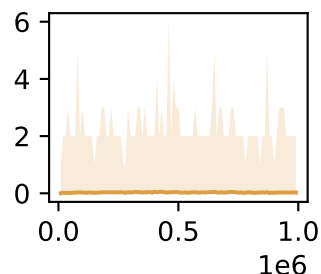

Place Furnace

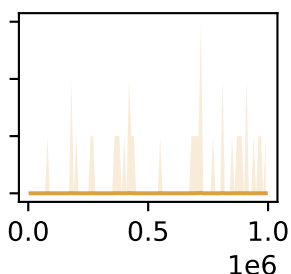

Place Plant

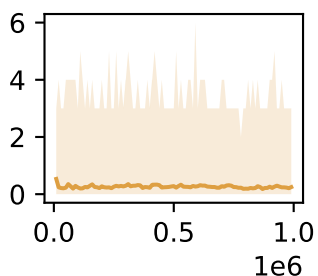

Place Stone

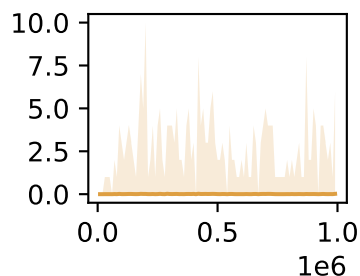

Place Table

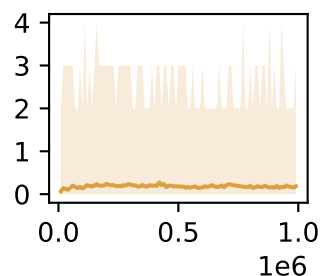

Wake Up

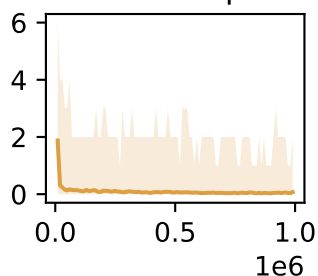

Supplement: supplementary_material [file counts-unsup_rnd.pdf › exif_iclr_crafter/lib/crafter_custom/plots/counts-unsup_rnd.pdf]
