# Supplementary material
Source: ML conference proceedings conference paper supplement (https://openreview.net/forum?id=uO3gGxzu8k)

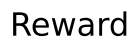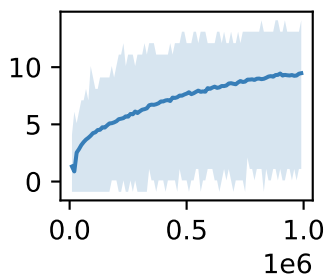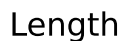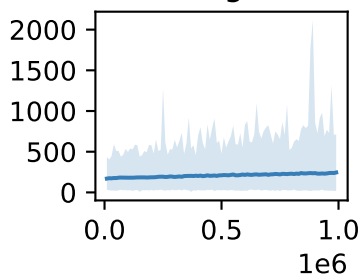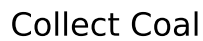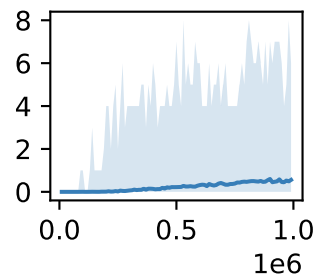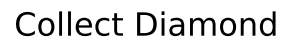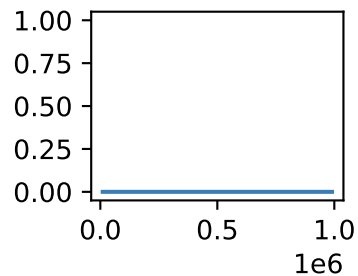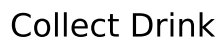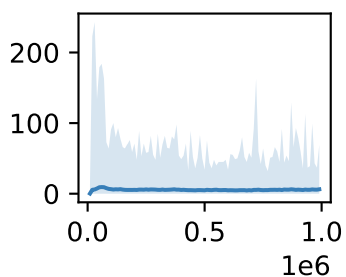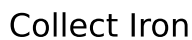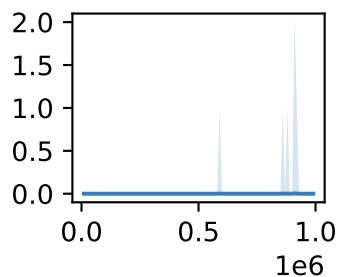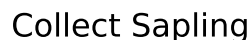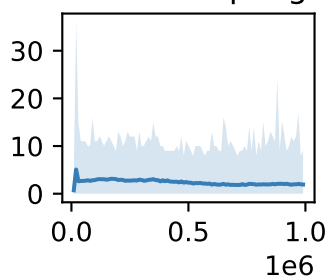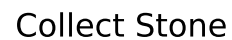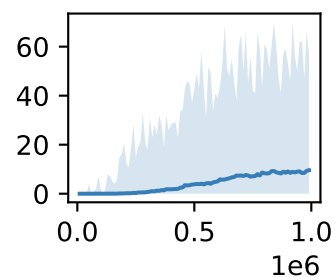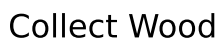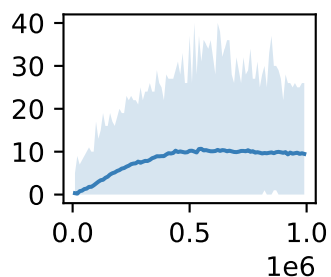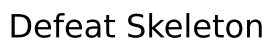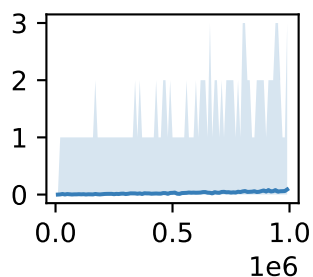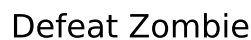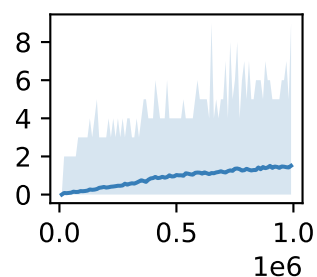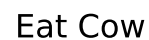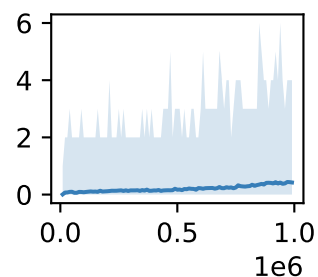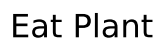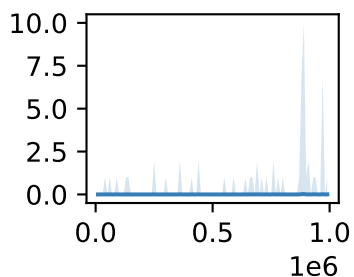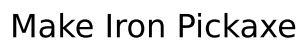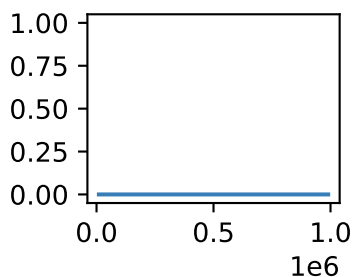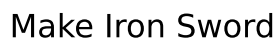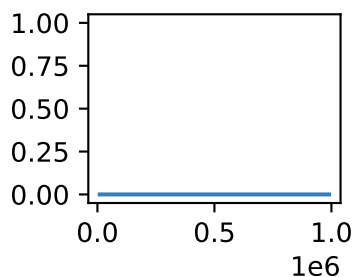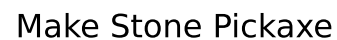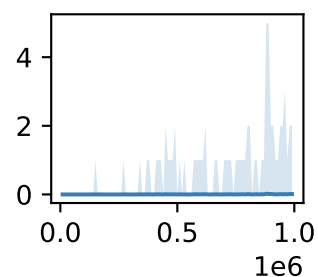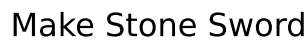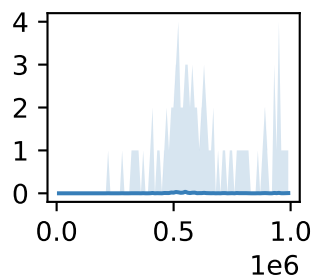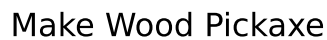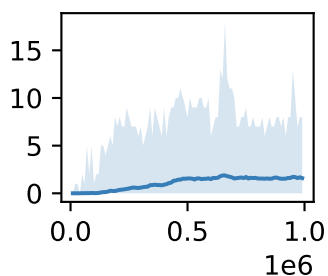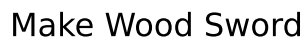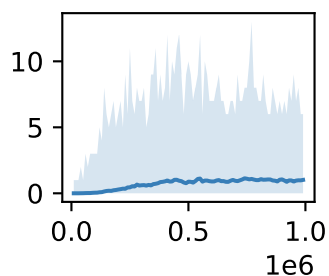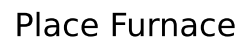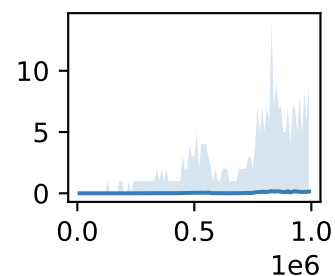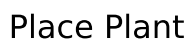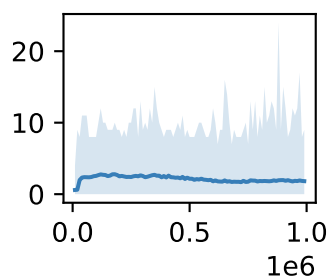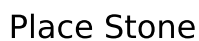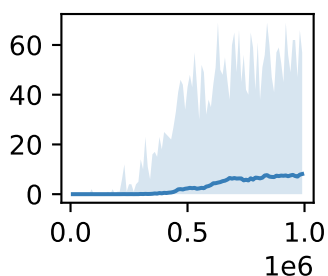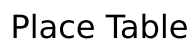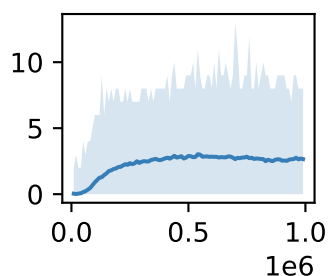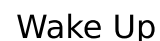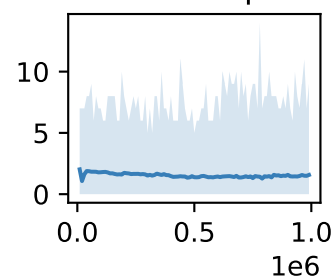

Supplement: supplementary_material [file counts-dreamerv2.pdf › exif_iclr_crafter/lib/crafter_custom/plots/counts-dreamerv2.pdf]

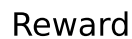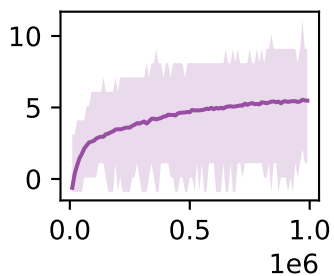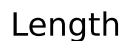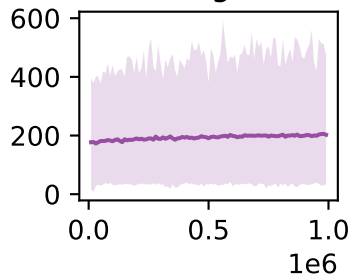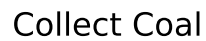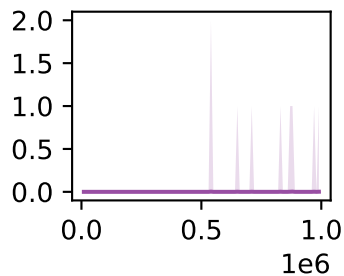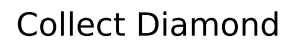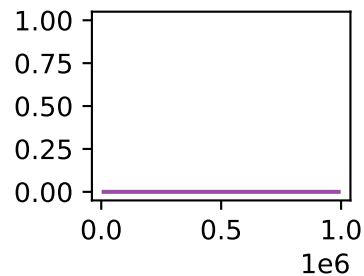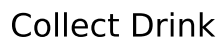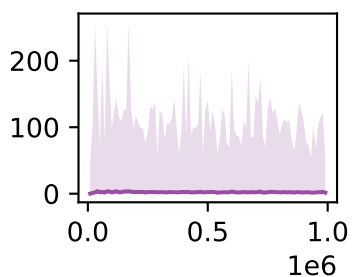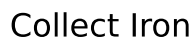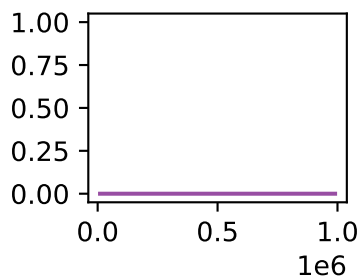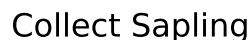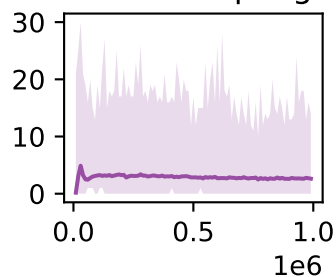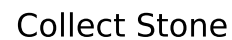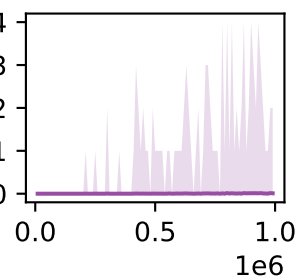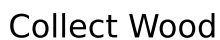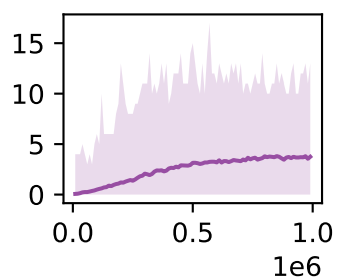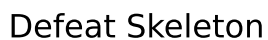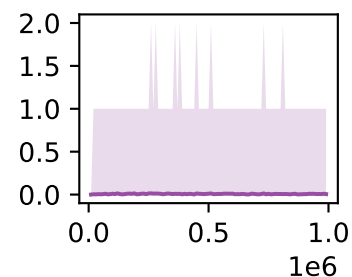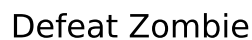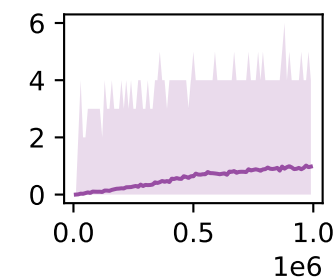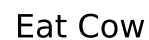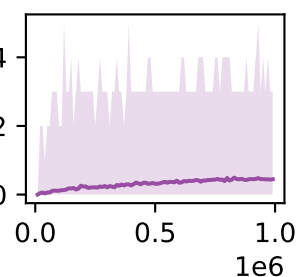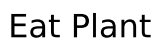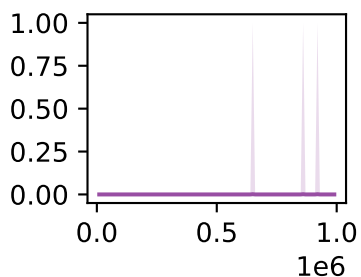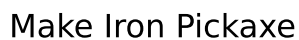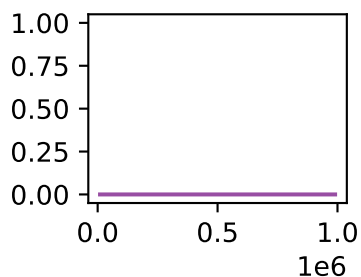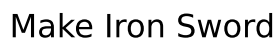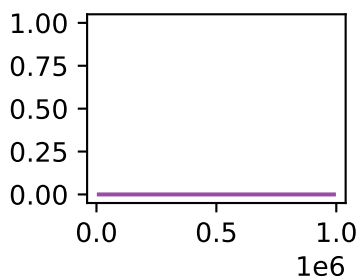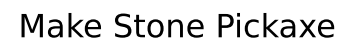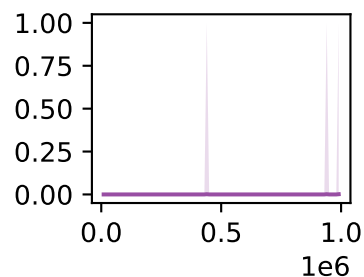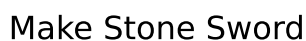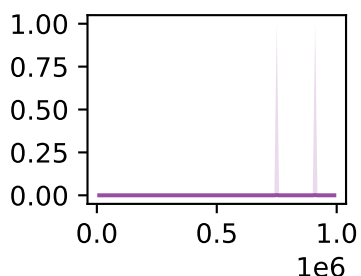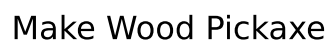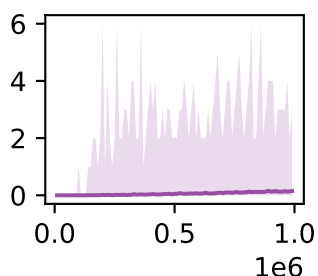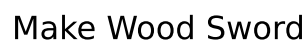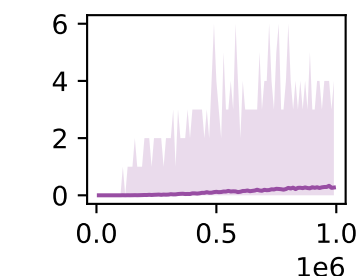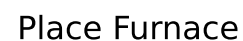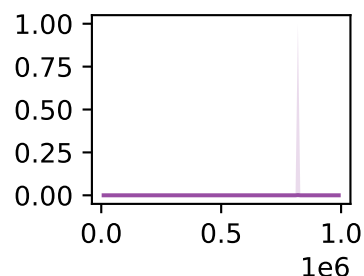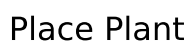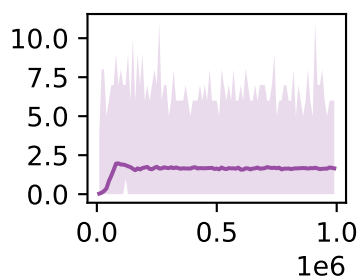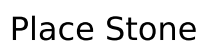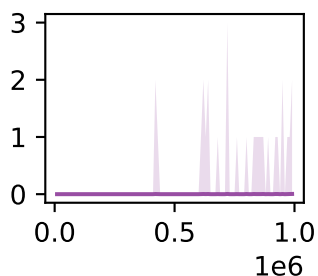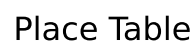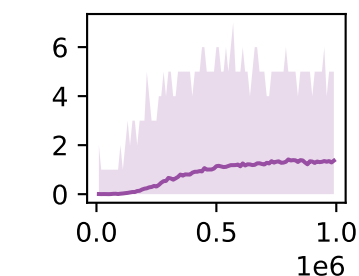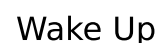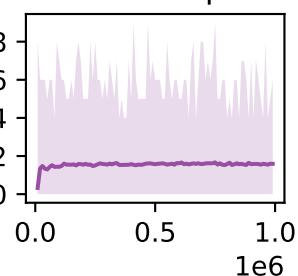

Supplement: supplementary_material [file counts-rainbow.pdf › exif_iclr_crafter/lib/crafter_custom/plots/counts-rainbow.pdf]

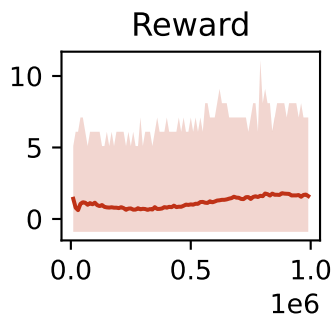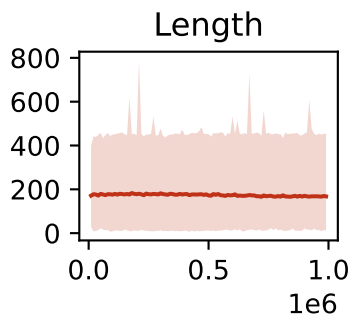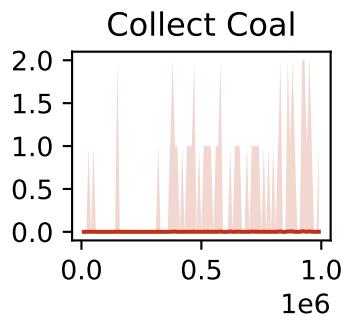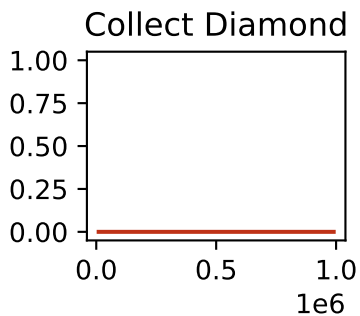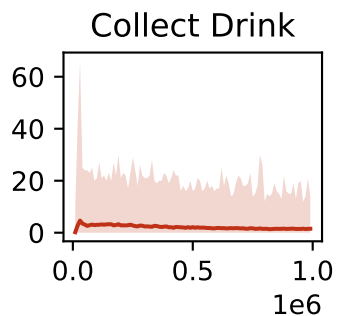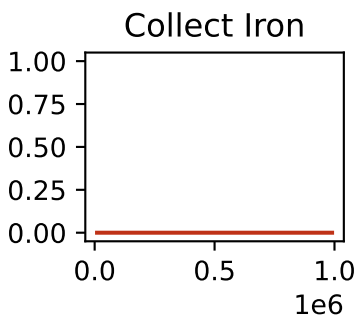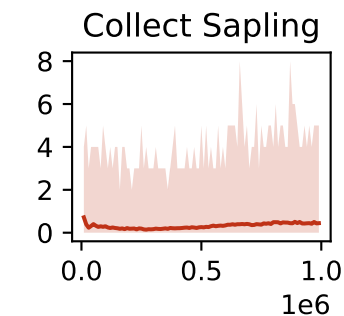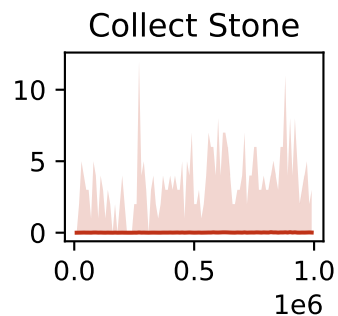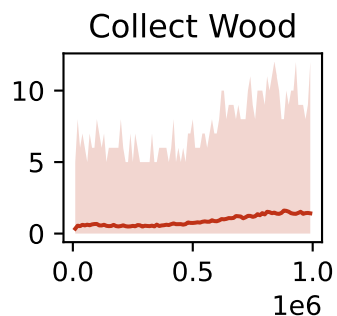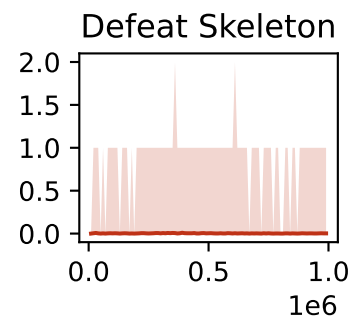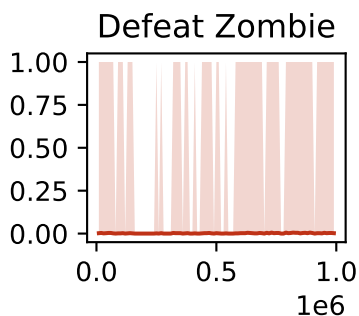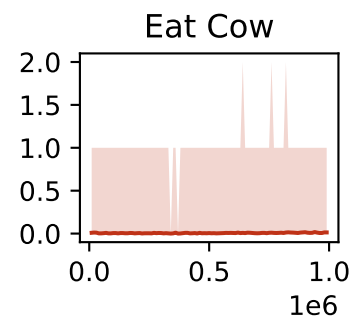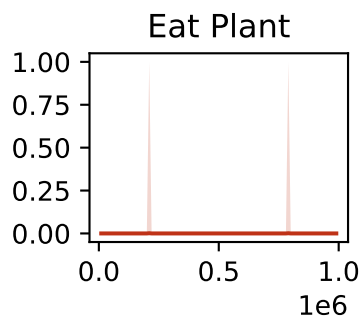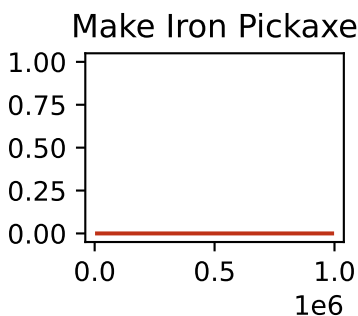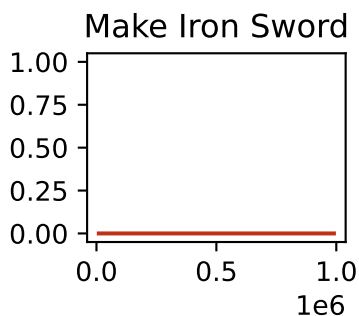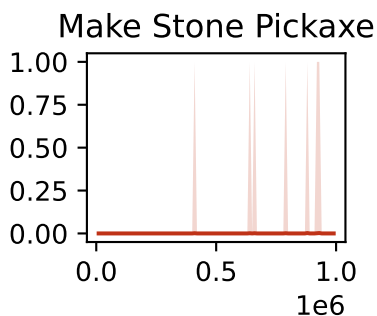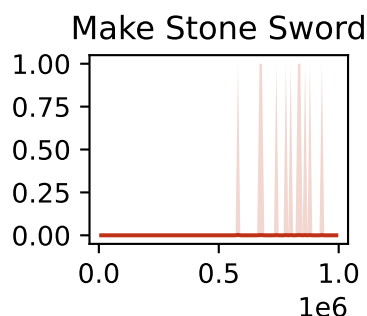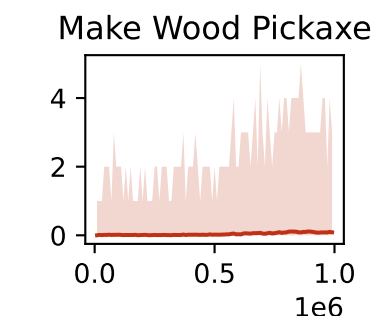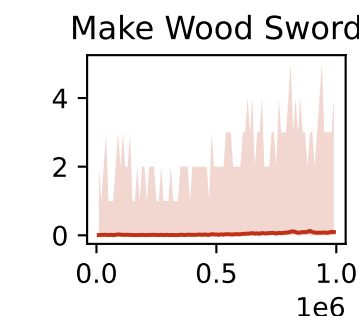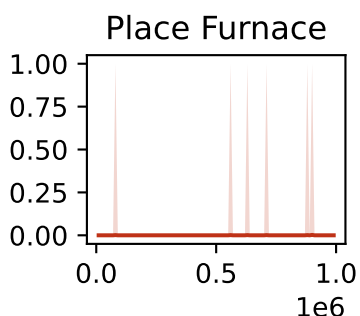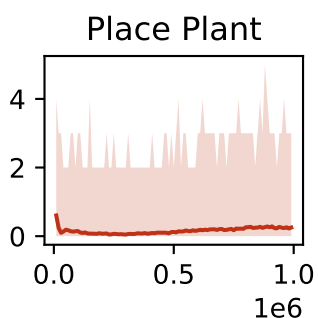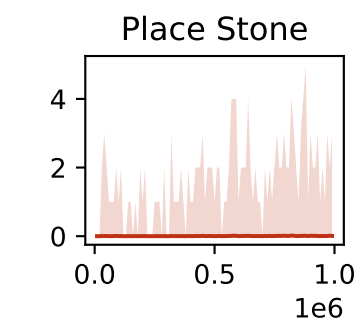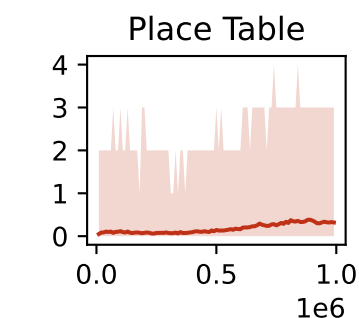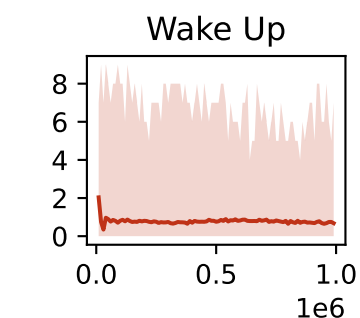

Supplement: supplementary_material [file counts-unsup_plan2explore.pdf › exif_iclr_crafter/lib/crafter_custom/plots/counts-unsup_plan2explore.pdf]

# Crafter Reward

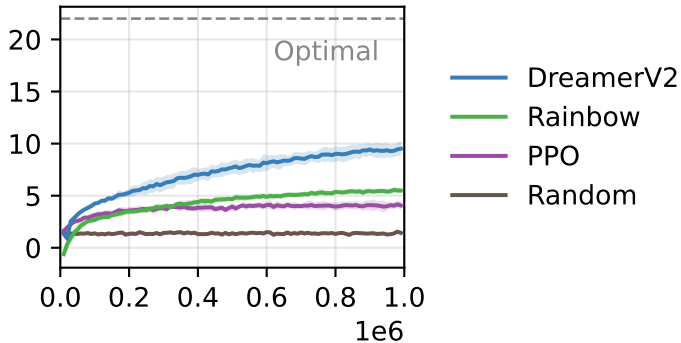

Supplement: supplementary_material [file reward.pdf › exif_iclr_crafter/lib/crafter_custom/plots/reward.pdf]

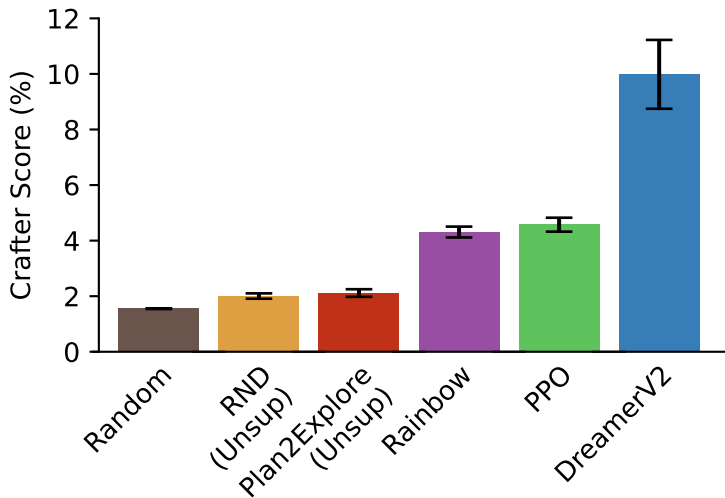

Supplement: supplementary_material [file scores-agents.pdf › exif_iclr_crafter/lib/crafter_custom/plots/scores-agents.pdf]

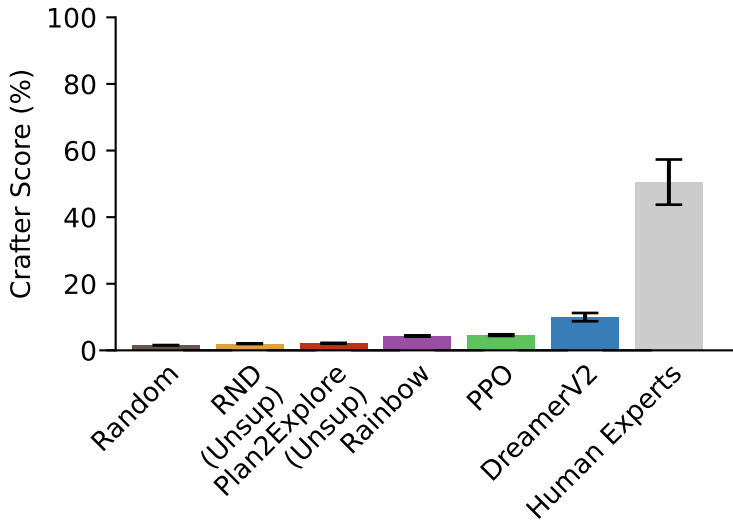

Supplement: supplementary_material [file scores-human.pdf › exif_iclr_crafter/lib/crafter_custom/plots/scores-human.pdf]

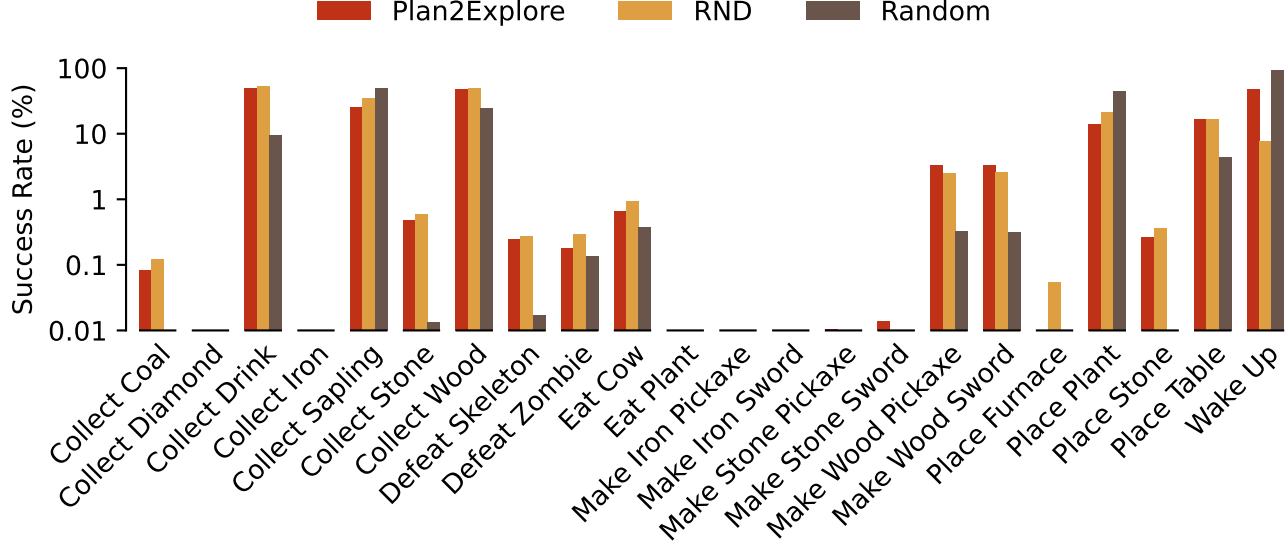

Supplement: supplementary_material [file spectrum-noreward.pdf › exif_iclr_crafter/lib/crafter_custom/plots/spectrum-noreward.pdf]

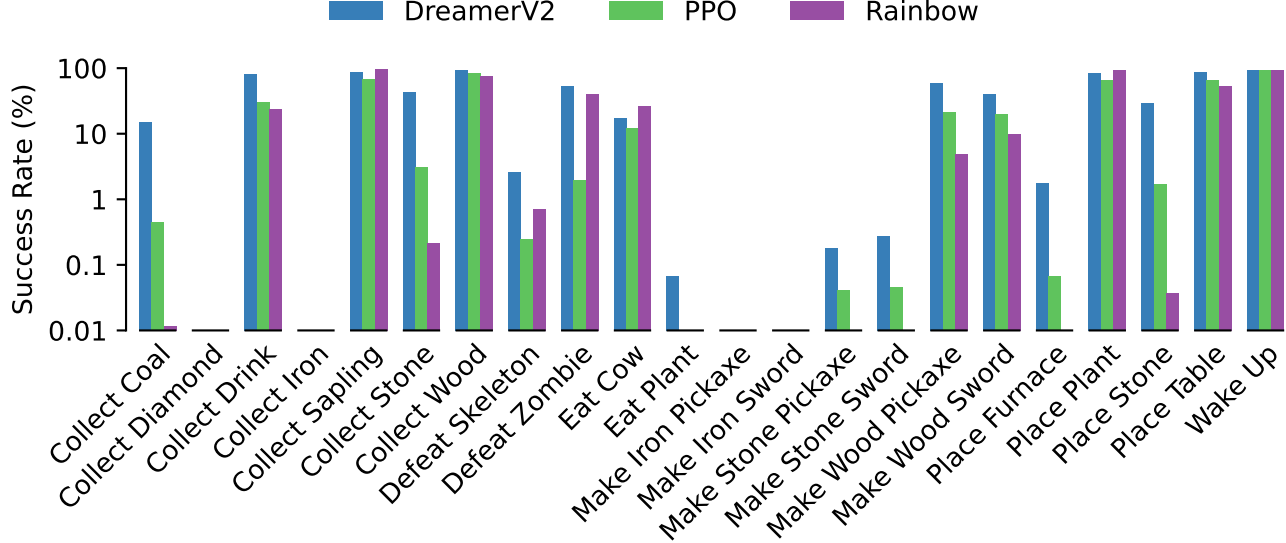

Supplement: supplementary_material [file spectrum-reward.pdf › exif_iclr_crafter/lib/crafter_custom/plots/spectrum-reward.pdf]
